# Supplementary material
Source: publisher site journal article supplement (https://www.dovepress.com/article/supplementary_file/563551/Supplement%201.docx)
Supplement: Supplementary file 1 [file Supplement%201.docx]

**Table S1 Serum index in mice(CAT, GSH-Px, SOD)**

| Group (n=6 ) | CAT (U/mL) | GSH-Px (U/L) | SOD (U/mL) |
| --- | --- | --- | --- |
| Control | 87.10 ± 4.16 | 146.95 ± 5.76 | 305.49 ± 15.36 |
| Model | 51.69 ± 4.45 | 85.92 ± 7.14 | 174.62 ± 13.20 |
| BSCO-Low | 68.18 ± 5.92 | 108.48 ± 6.76 | 215.97 ± 12.97 |
| BSCO-Med | 71.53 ± 3.07 | 118.91 ± 6.98 | 251.83 ± 16.80 |
| BSCO-High | 79.21 ± 4.93 | 128.11 ± 6.48 | 269.08 ± 18.32 |
| CTX | 82.43 ± 3.10 | 136.67 ± 6.66 | 295.51 ± 17.19 |
